# Supplementary material
Source: PubMed Central journal article supplement (PMC5605390)

# **WDR62 is associated with the spindle pole and mutated in human microcephaly**

Adeline K. Nicholas, Maryam Khurshid, Julie Désir, Ofélia P. Carvalho, James J. Cox, Gemma Thornton, Rizwana Kausar, Muhammad Ansar, Wasim Ahmad, Alain Verloes, Sandrine Passemard, Jean-Paul Misson, Susan Lindsay, Fanni Gergely, William B. Dobyns, Emma Roberts, Marc Abramowicz, C. Geoffrey Woods

[Supplementary Information](#)

Supplementary Table 1

**Analysis of parallel sequencing data to find pathogenic mutations.**

Mapped sequence data was filtered to remove non-coding, synonymous variants and those variants known to be non-pathogenic polymorphisms. This left a single candidate gene, *WDR62*, common to both mapping families.

|                                                                                      | <b>P22011</b>        | <b>P22016</b> |
|--------------------------------------------------------------------------------------|----------------------|---------------|
| Targeted region (no. of bases)                                                       | 2,752,492            | 2,752,492     |
| % coverage of reference                                                              | 97.27                | 97.51         |
| No. of unique matching reads                                                         | 78,894               | 167,506       |
| Range of depth of coverage of variants (no. of reads)                                | 3-222                | 3-199         |
| % of variants with depth of coverage of at least 10 reads                            | 84.1                 | 92.6          |
| % of variants with depth of coverage of at least 20 reads                            | 58.1                 | 75.8          |
| No. of coding variants                                                               | 63                   | 64            |
| No. of coding variants not in UCSC Genome Browser SNP 130                            | 10                   | 13            |
| No. of hand-curated non-synonymous coding variants not in UCSC Genome Browser SNP130 | 2                    | 1             |
| Gene(s) bearing non-synonymous coding variants                                       | <b>WDR62</b><br>HKR1 | <b>WDR62</b>  |

## Supplementary Figure 1

### Sequence chromatograms showing the six homozygous mutations identified in the seven pedigrees.

Black arrows indicate position of mutation. The chromatograms are in pairs with the relevant Pedigree number indicated above. For each pair a homozygous wild type sequence is shown on the left and to its right the homozygous mutation.

(For the PC12 chromatograms there is a known SNP, [rs2074435](#), 5' to the polyC run, where the common allele is CAG coding for glutamine, and the rarer allele CTG coding for leucine. Both the control shown and the PC12 patient are homozygous for the rarer T allele.)

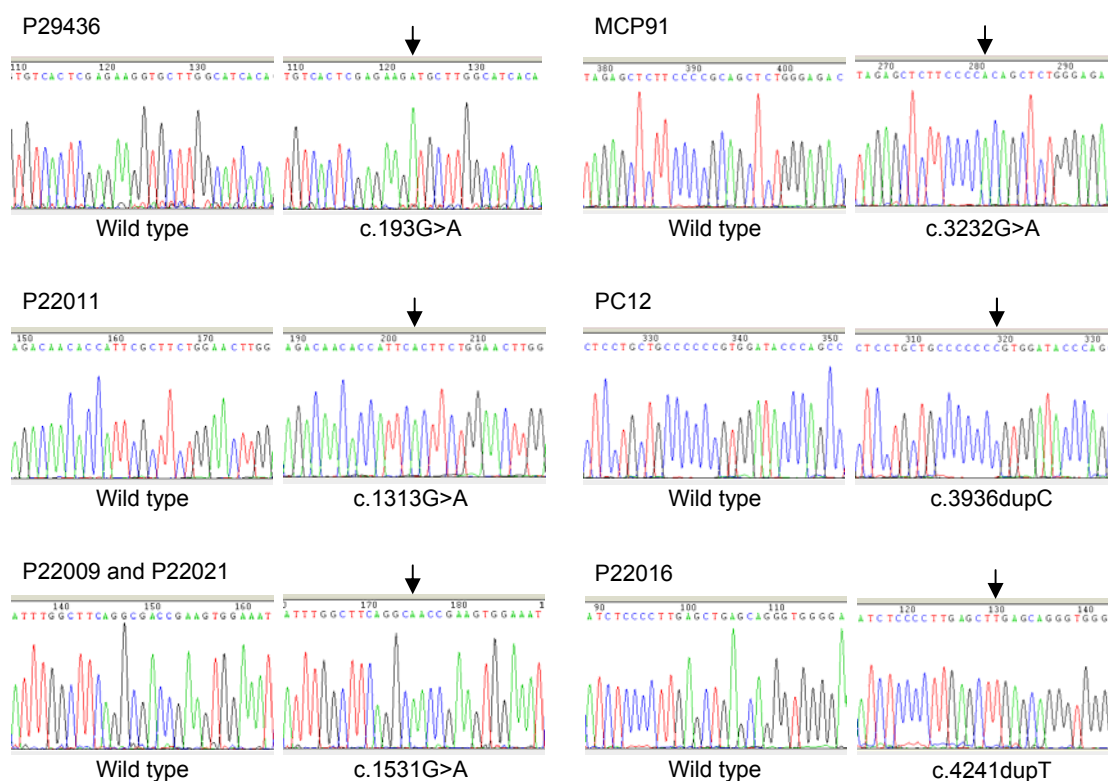

## Supplementary Figure 2

### **Evolutionary analysis of the four *WDR62* missense mutations found in the study.**

Each mutation is given at the top of each table. In each table, species is stated on the left. In the middle the 20 amino acid sequence either side of the mutation are given. The mutation is in the centre position in bold by itself above the wild type amino acid it replaces. To the right are given the reference protein sequences used in this analysis. Where no sequence is give we derived the peptide sequence from available nucleotides form the relevant species followed by translation and curation. Stars indicate that all amphibians and *Drosophila* had the same amino acid sequence. MAPKBP1 is the only homologue of *WDR62* in mammals and so is also shown to allow assessment of the degree of evolutionary conservation. Grey shading of amino acids indicates deviations from the human canonical sequence. For the p.Ala1078Thr mutation more species are given, as we cannot determine if this is an atavistic mutation or a harmless (but very rare) polymorphism.

p.Val65Met

mutation

|               | <b>M</b>                         |              |
|---------------|----------------------------------|--------------|
| human         | TASEETVQNRVSLEKVLGITAQNSSGLTCDP  | NP_001077430 |
| chimpanzee    | TASEETVQNRVSLEKVLGITAQNSSGLTCDP  | XP_001162576 |
| mouse         | AAPEDTVQNRVTLEKVLGITAQNSSGLTCDP  | NP_666298    |
| rat           | AAPEDTVQNRVTLEKVLGITAQNSSGLTCDP  | XP_001075797 |
| danio         | GSHRDIHNRVVLEKVLGITASSSSALTCDP   | XP_002664595 |
| human MAPKBP1 | GNRREDLSSKVITLEKVLGITVSGGRGLACDP | NP_001122080 |
| frog*         | GTKKEDLSSKVITLEKVLGITVSAGRGLSCDP | NP_001086542 |
| melanogaster* | KRNDEQLMDRIKLLKVLGLTVCSNAALDVSP  | NP_608630    |

p.Arg438His

mutation

|               | <b>H</b>                         |              |
|---------------|----------------------------------|--------------|
| human         | LPSGSFLTCSNDNTIRFWNLDSSPDSHWQKN  | NP_001077430 |
| chimpanzee    | LPSGSFLTCSNDNTIRFWNLDSSPDSHWQKN  | XP_001162576 |
| mouse         | LPSGTFLTCSNDNTIRFWNLDASDTRWQKN   | NP_666298    |
| rat           | LPSGTFLTCSNDNTIRFWNMDSGSDTQWRKN  | XP_001075797 |
| danio         | LSPGSFLTCSNDNTIRLWRSE-SPQSHSAAL  | XP_002664595 |
| human MAPKBP1 | LPPSSFLTCSNDNTIRLWNTESSGVHGSTLH  | NP_001122080 |
| frog*         | LPPNSFLTCSNDSTIRLWNMETSNIHGTAALH | NP_001086542 |
| melanogaster* | LPEECFVTCSSDDTIRVWGLDGCTNNDIYRR  | NP_608630    |

p.Asp511Asn

mutation

|               | <b>N</b>                         |              |
|---------------|----------------------------------|--------------|
| human         | RVMQVSPDGQHLASGDRSGNLR IHELHFMDE | NP_001077430 |
| chimpanzee    | RVMQVSPDGQHLASGDRSGNLR IHELHFMDE | XP_001162576 |
| mouse         | RVMQVSPDGQHLASGDRSGNLR IHELHFMDE | NP_666298    |
| rat           | RVMQVSPDGQHLASGDRSGNLR IHELHFMDE | XP_001075797 |
| danio         | RVLGISPDGQHLAGDRSGNLRIFGLQFMDE   | XP_002664595 |
| human MAPKBP1 | RSVCVSPNGQHLAGDRMGTLRVHELQSLSE   | NP_001122080 |
| frog*         | RSVCVSPNGQHLAGDRGTGLRVHELQSMTE   | NP_001086542 |
| melanogaster* | RCIKISPELQHLASGDRCGNIRVYSLVNLRL  | NP_608630    |

p.Ala1078Thr

mutation

|               | <b>T</b>                                 |              |
|---------------|------------------------------------------|--------------|
| human         | HFETLTESPCRELFP <b>A</b> ALGDVEASEAEDHFF | NP_001077430 |
| chimpanzee    | HFETLTESPCRELFP <b>A</b> ALGDVEASEAEDYFF | XP_001162576 |
| orang-u-tan   | HFETLTESPCRELFP <b>A</b> ALGDVEASEAEDYFF |              |
| rhesus        | HFETLTESPCRELFP <b>A</b> ALGDVEASEAEDYFF |              |
| marmoset      | HFETLTESPCRELFP <b>T</b> ALGDTEASEAEDYFF |              |
| horse         | HFETLTDAPPEELFHGSLRDVQASEAEDYFN          | XP_001492683 |
| pig           | HFETLTDAPAEELFHGSLRDLKASEAKDDFF          | NP_001121933 |
| mouse         | HFETLTDAPTEELFHGSLGDIKISETEDYFF          | NP_666298    |
| rat           | HFETLTDAPAEELFP <b>G</b> SLGDIKISETDDYFF | XP_001075797 |
| panda         | HFETLTDAPAEELFHGALRDLEASESEDFN           | EFB29891     |
| cow           | HFETLTDAPAEELFHGSLRDLKAPETEDDF           | XP_870429    |
| rabbit        | HFETLTDAPAEELFHGSLGDANVPEAEDVFL          | XP_002722275 |
| danio         | HFDTLGVAT-NEKFNTDLSLQPT-TESNFL           | XP_002664595 |
| human MAPKBP1 | -----                                    | NP_001122080 |
| frog*         | -----                                    | NP_001086542 |
| melanogaster* | -----                                    | NP_608630    |

Supplementary Figure 3

**Comparison of endogenous WDR62 and ASPM staining in metaphase HeLa cells.**

HeLa cells were stained with ASPM and WDR62 antibodies. Both WDR62 and ASPM antibodies are raised in rabbit so could not be used concurrently. The top panel shows WDR62 (red), and the lower panel ASPM (red). Cells were costained with  $\gamma$ -tubulin (green) to mark centrosomes,  $\alpha$ -tubulin (white) to mark the mitotic spindle, with DNA (blue) stained with DAPI. ASPM and WDR62 have an apparently identical subcellular localization at the spindle poles in metaphase. A representative cell in metaphase was picked for each panel of four images, however >50 cells were assessed which gave identical results.

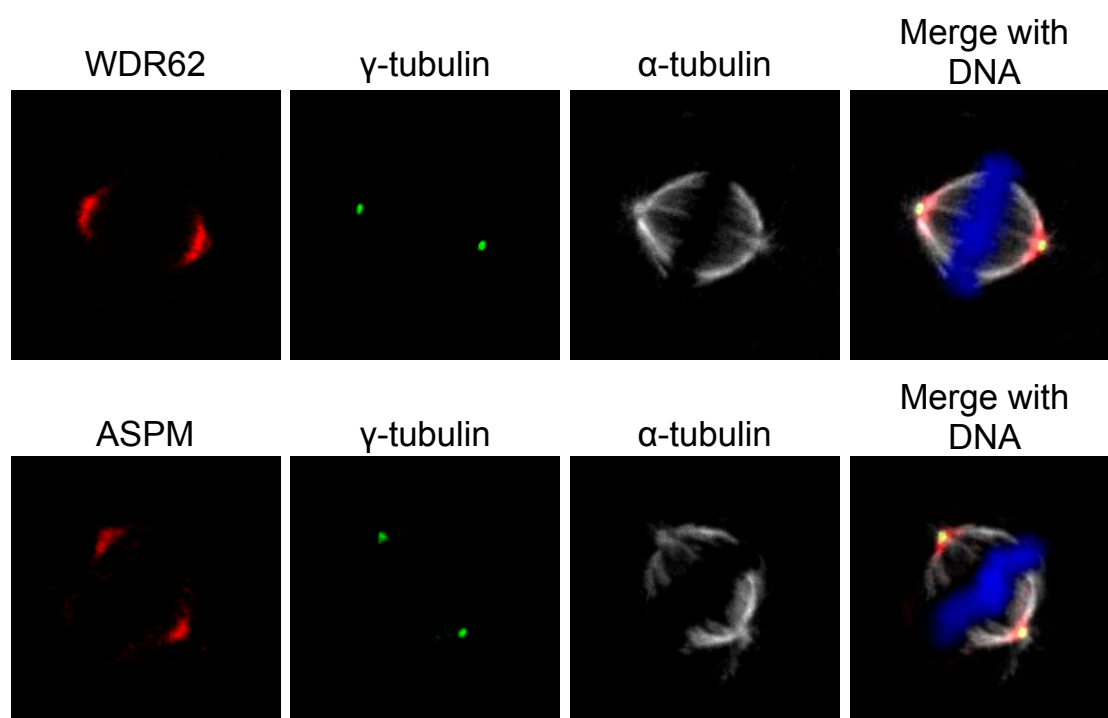

Supplementary Figure 4

**Overexpression of WDR62-GFP c.4241dupT mutant construct in HeLa cells.**

The c.4241dupT/Leu1414LeufsX14 mutation was engineered into a WDR62-GFP construct and expressed in HeLa cells. The 4 by 5 panel shows that the mutant WDR62 does not accumulate at the spindle pole during mitosis (in 50 of 50 cells analyzed). This can be compared to wild type cells in Figure 4. Cells were stained with antibodies against  $\gamma$ -tubulin (red) marking the centrosome,  $\alpha$ -tubulin (white) marking the microtubules of the mitotic spindle, with DNA (blue) stained with DAPI. WDR62-GFP protein (green) was directly visualized. Scale bar denotes 5 $\mu$ m.

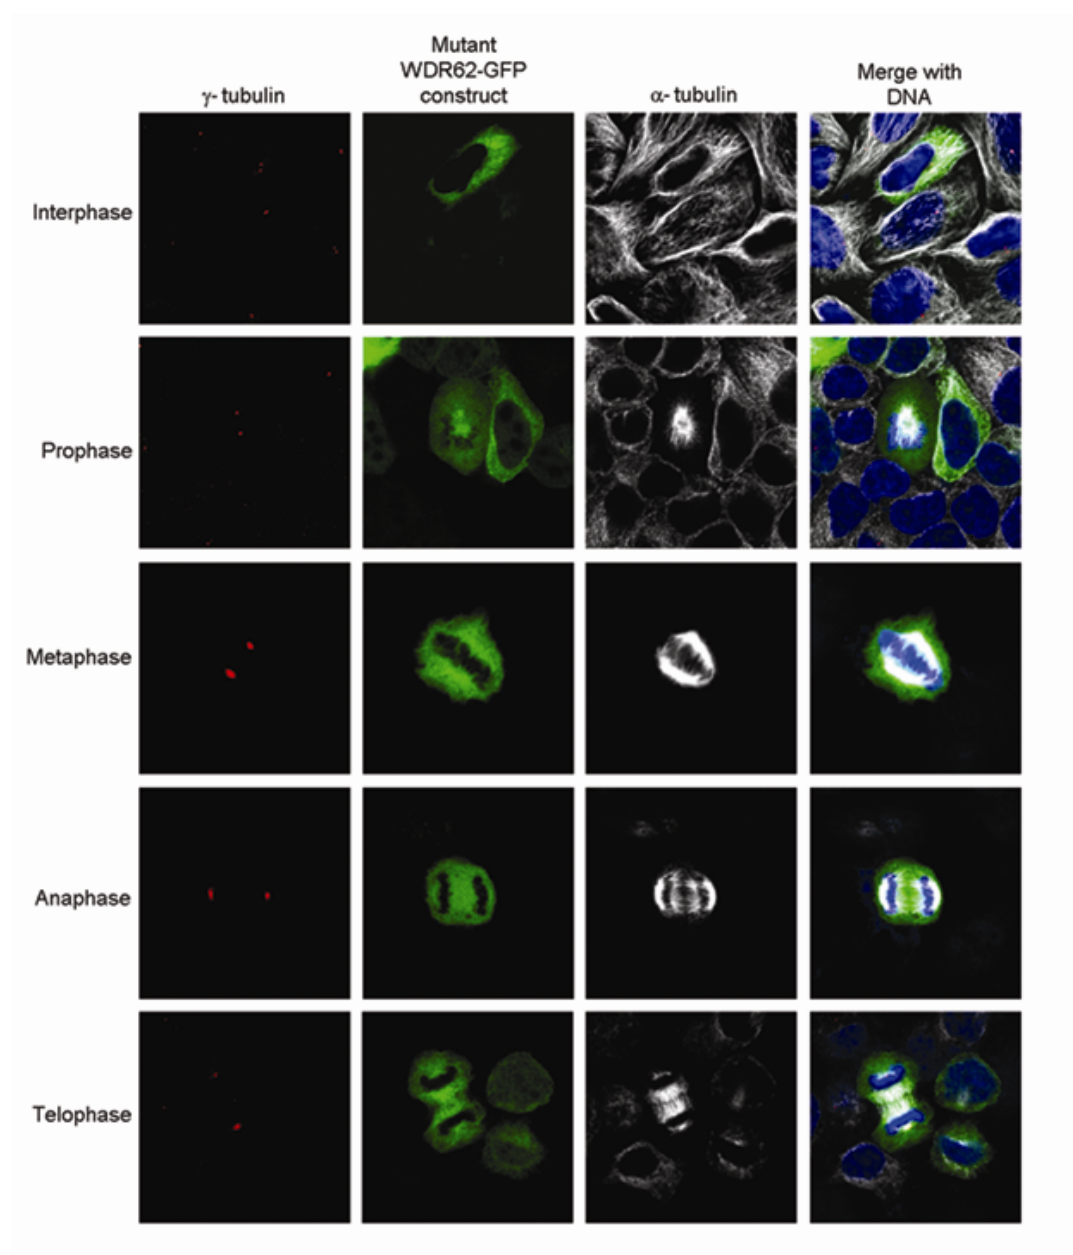

Supplementary Figure 5

**Details of Figure 5c showing human embryonic cerebral cortex neuroepithelium.**

Figure 5c is a close up of human CS22 neuroepithelium stained with WDR62 (red),  $\gamma$ -tubulin (green) and DAPI (blue). This Supplementary Figure shows the whole confocal microscopy image from which Figure 5 is taken. Here the WDR62 (red) and  $\gamma$ -tubulin (green) antibody staining are shown separately, as well as the composite on the right showing the nuclei stained with DAPI (blue). This image shows full depth of the human embryonic neuroepithelium, the region containing the apical neural precursor cells. WDR62 is localized only at the apical margin and only in some cells (presumably those undergoing mitosis). Scale bars denote 10 $\mu$ m.

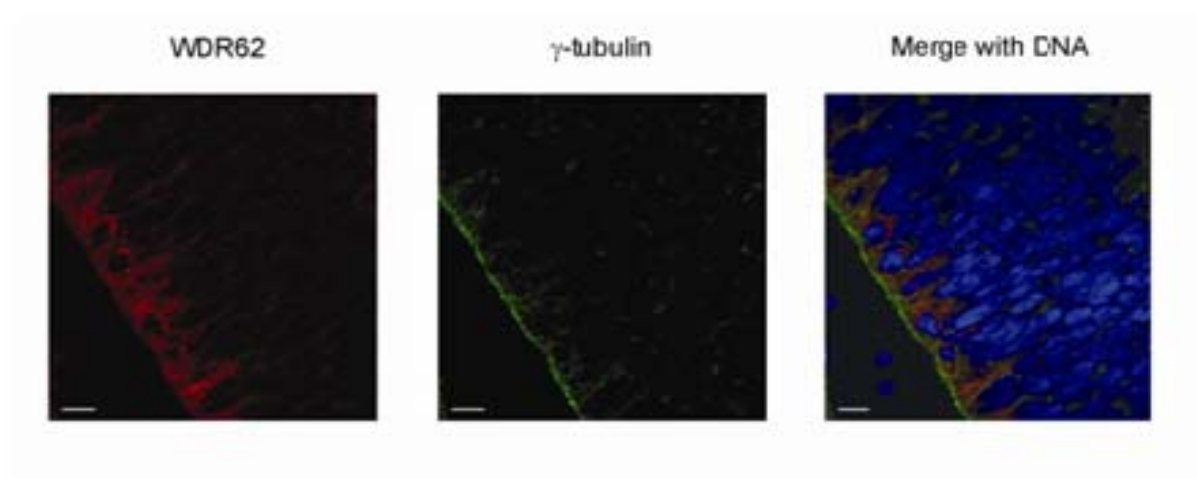



Supplementary Figure 6

**Immunohistochemistry to assess the specificity of the WDR62 antibody used in this study.**

To assess antibody specificity HeLa cells transfected with wild type WDR62-GFP construct were costained with the WDR62 antibody used in this study and an anti-GFP antibody. Representative cells in interphase and metaphase are shown. WDR62 and GFP antibody staining patterns are identical indicating antibody specificity. Cells were stained with antibodies against  $\gamma$ -tubulin (white) to mark centrosomes, GFP (green), WDR62 (red), with DNA (blue) stained with DAPI.

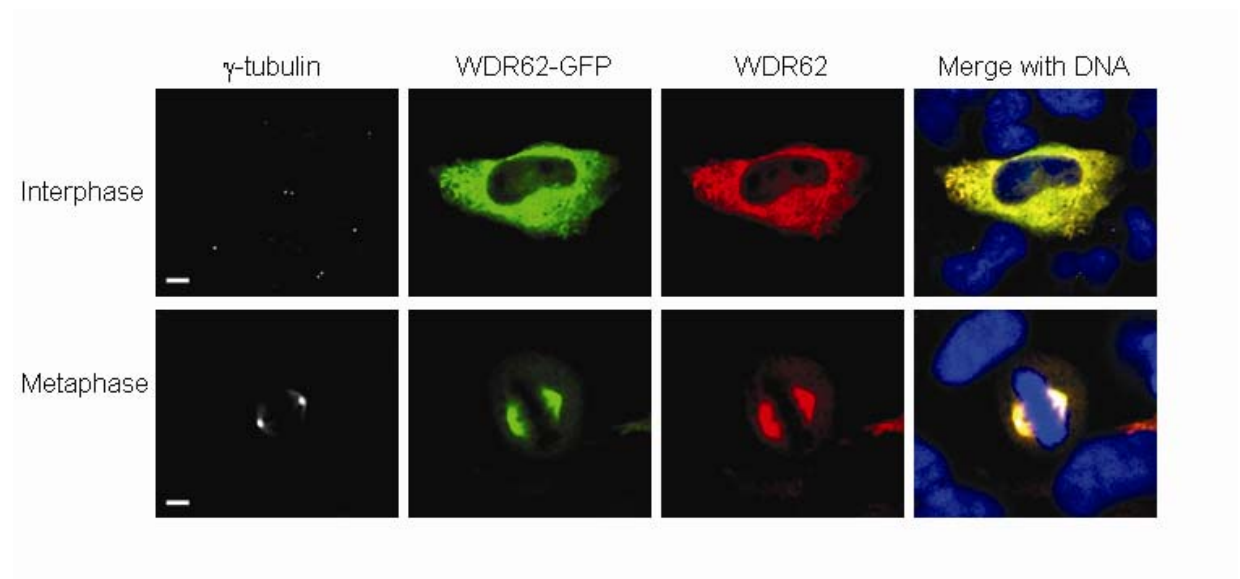

Supplementary Figure 7

**Western blot to assess the specificity of the WDR62 antibody used in this study.**

HeLa cells transfected with the wild type WDR62-GFP construct and untransfected controls were lysed and the cell lysates probed with anti-WDR62 (left blot) and anti-GFP (right blot) antibodies. The untransfected controls lane shows a single band (of the size expected for WDR62) when probed with the WDR62 but not the GFP antibody, corresponding to endogenous WDR62. The WDR62-GFP transfection lysates lane shows a double band when probed with WDR62, the smaller band corresponding to endogenous WDR62, plus a slightly larger band corresponding to the WDR62-GFP fusion protein. When probed with GFP it shows a single prominent band of the size expected for the WDR62-GFP fusion protein. These results demonstrate WDR62 antibody specificity.

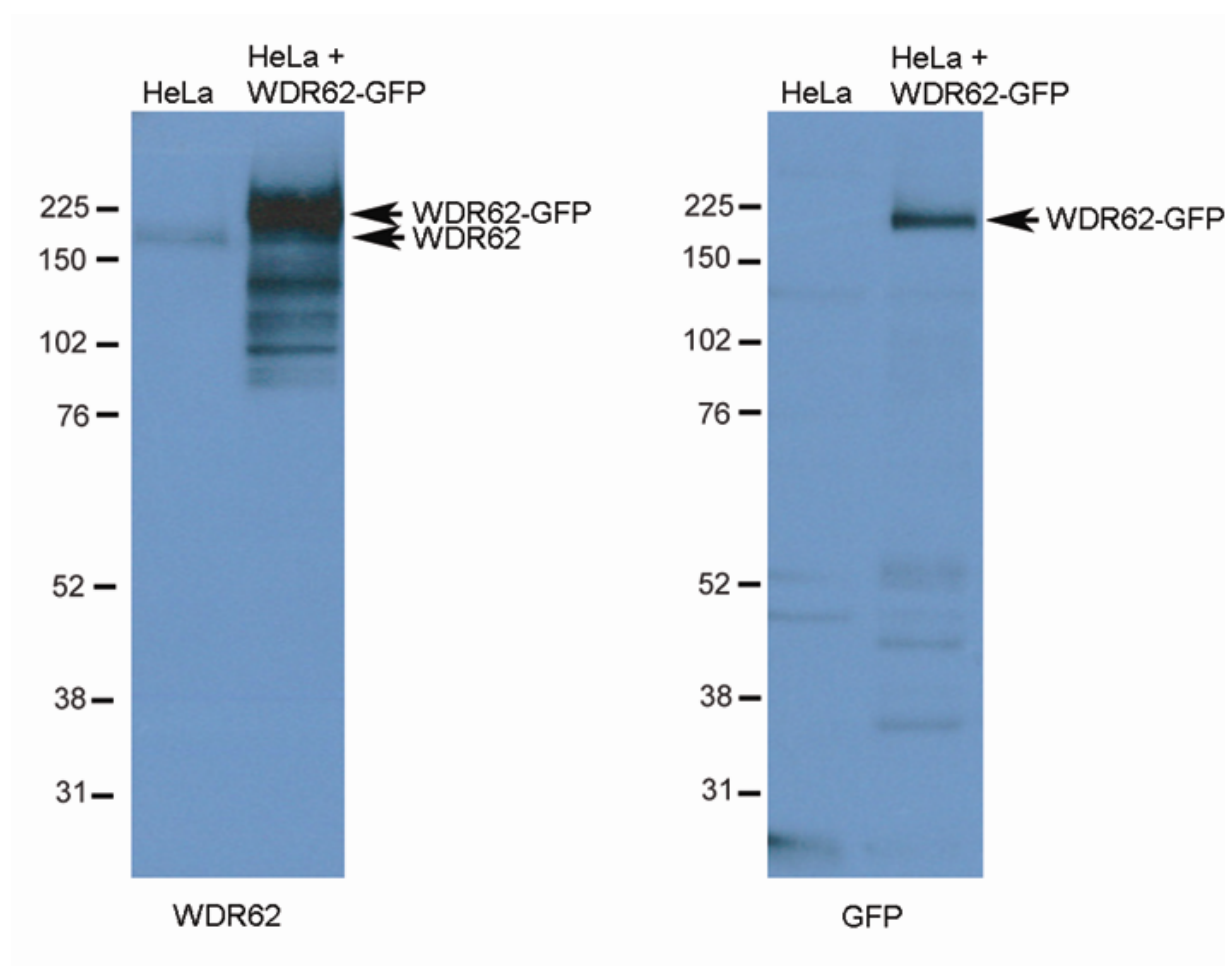

Supplement: NIHMS898566-supplement-Supp1.pdf [file NIHMS898566-supplement-Supp1.pdf]
